# Supplementary material for: Wild Rosa Endophyte M7SB41-Mediated Host Plant’s Powdery Mildew Resistance
Source: MDPI journal article supplement (doi:10.3390/jof9060620), 2023-05-27
Supplement: s1 [file s1]

## Supplement Materials

### Wild *Rosa* endophyte M7SB41-mediated host plant's powdery mildew resistance

Yi Zhao, Wenqin Mao, Wenting Tang, Marcos Antônio Soares, Haiyan Li\*

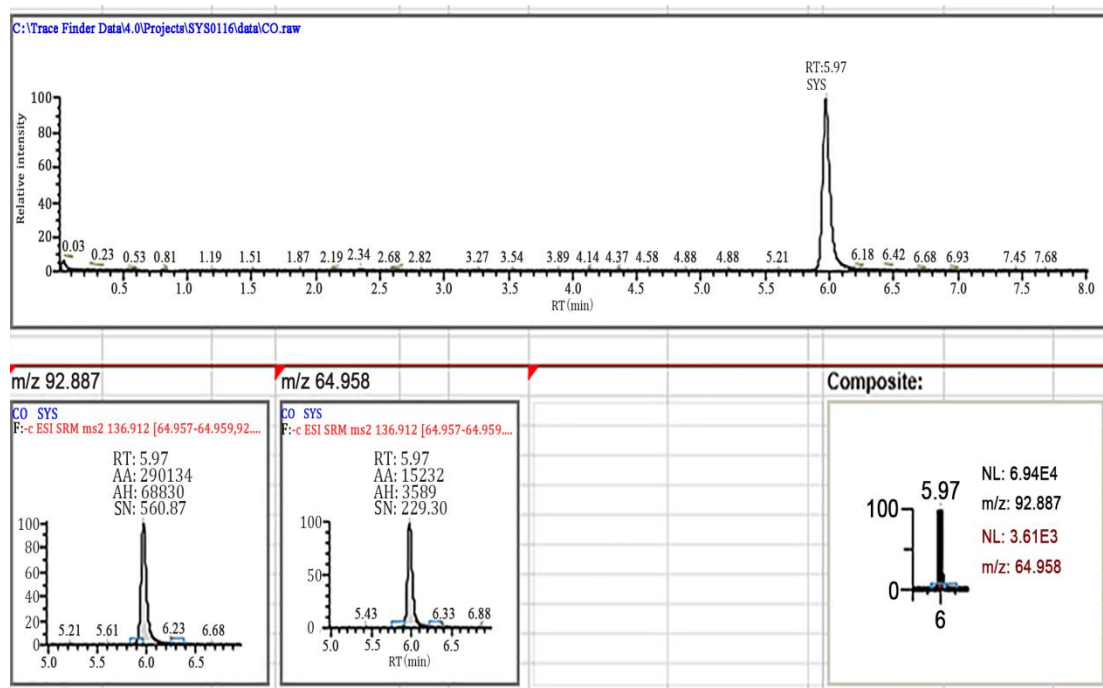

(a)

\*: Corresponding author, E-mail: lhyxrn@163.com; Tel. +86 (871)5920751; Fax +86 (871) 5920570.

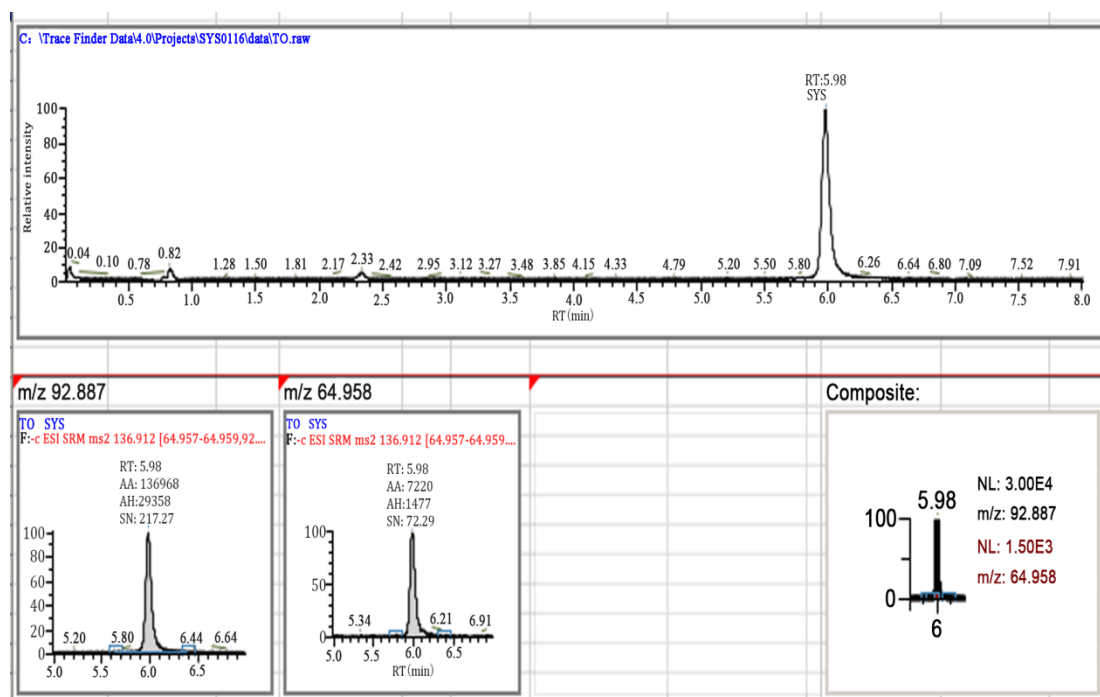

(b)

**Fig. S1** Chromatogram and mass spectrum of salicylic acid in tobacco leaves of E+ and E- group. (a) and (b) represent the total ion chromatogram, quantitative ion and qualitative ion of salicylic acid in E + and E - group, respectively.

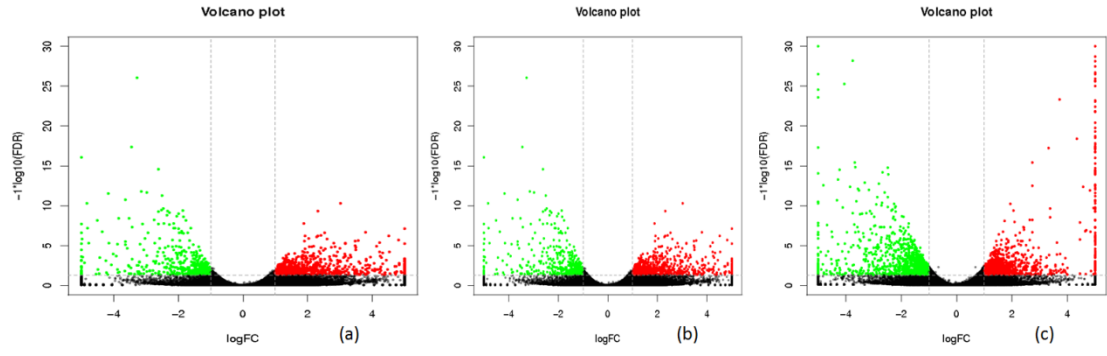

**Fig. S2** E- vs E+ DEGs volcano plot. Volcano plot of the differentially expressed genes (E- vs E+) at (a) 0, (b) 24 and (c) 72 hr of infection with powdery mildew. Red: Significantly up-regulated genes; Green: Significantly down-regulated genes; Black: Not differential expressed.

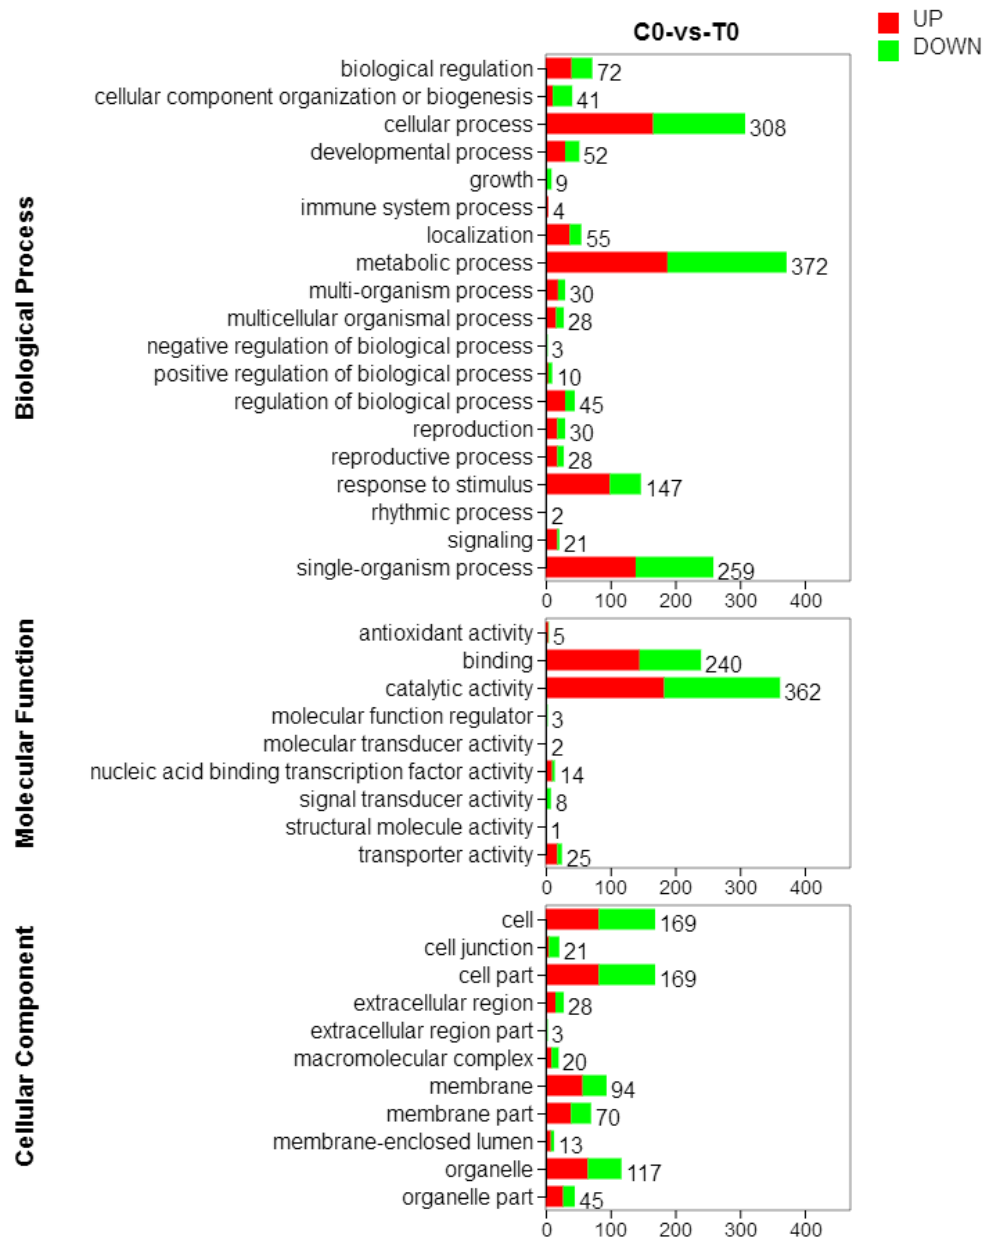

(a)

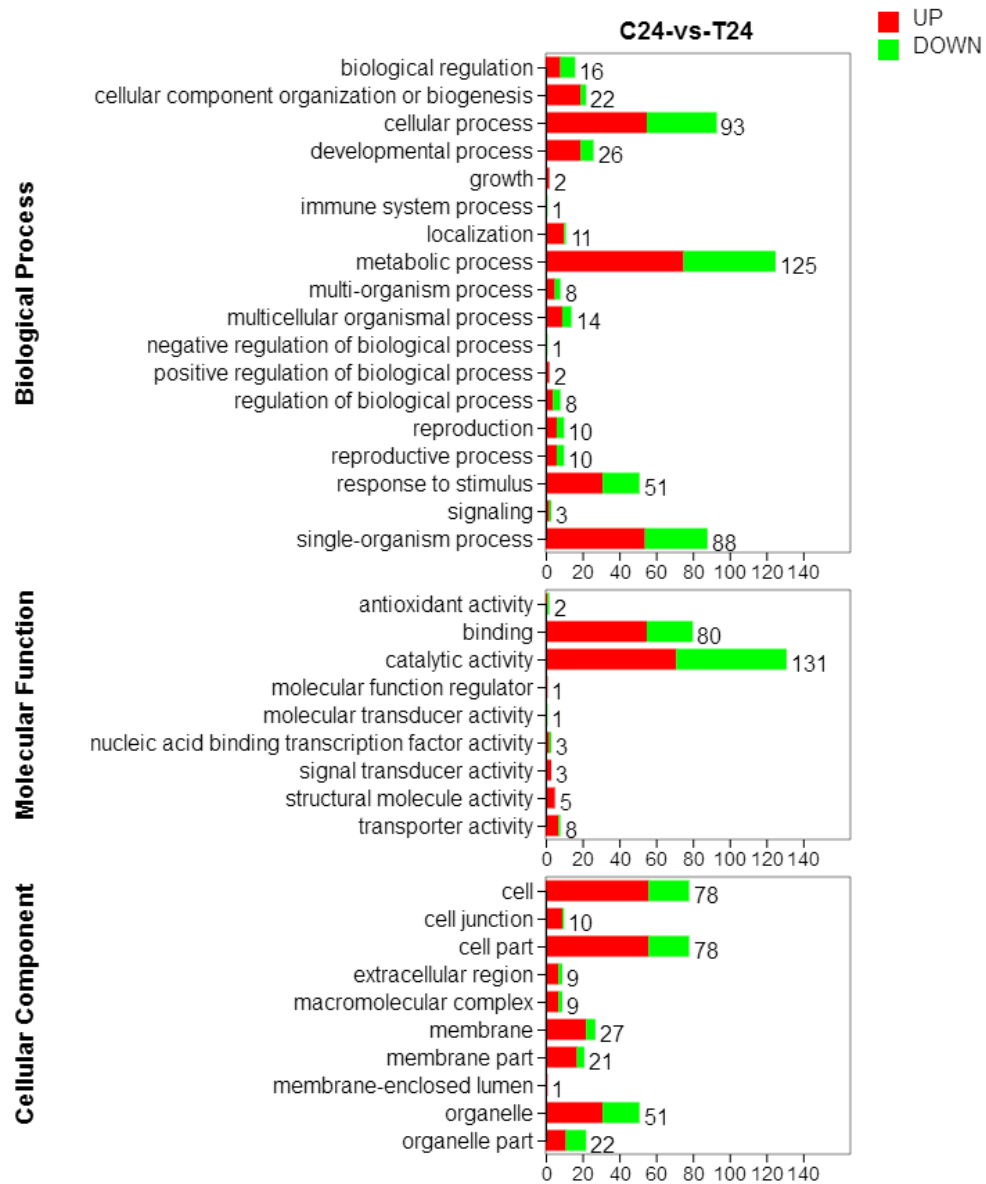

(b)

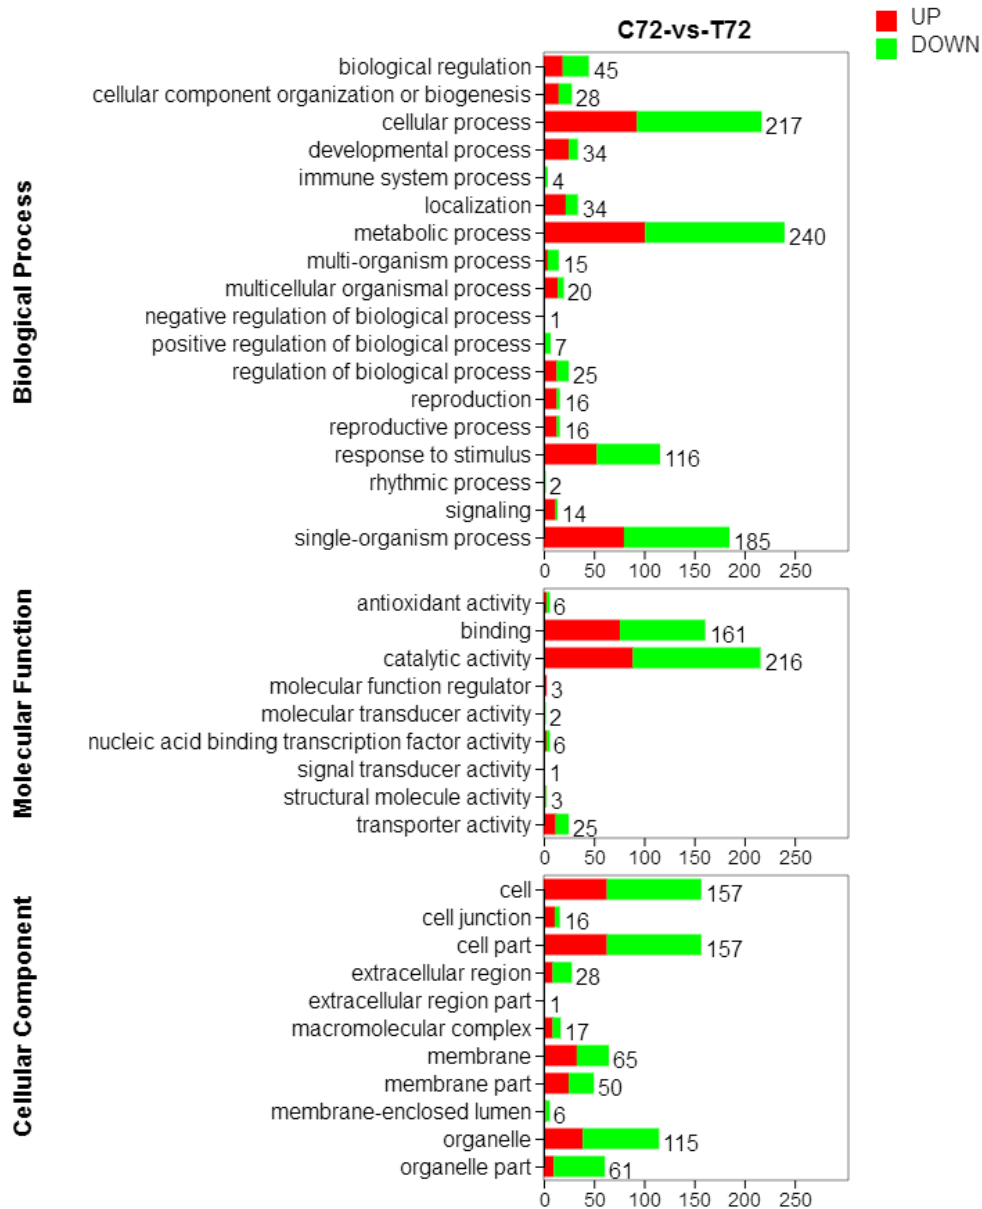

(c)

**Fig. S3** Gene ontology (GO) classification histogram of E- vs E+ DEG. Gene ontology classification of the differentially expressed genes at (a) 0, (b) 24 and (c) 72 hr of infection with powdery mildew; Red: Significantly up-regulated genes; Green: Significantly down-regulated genes.

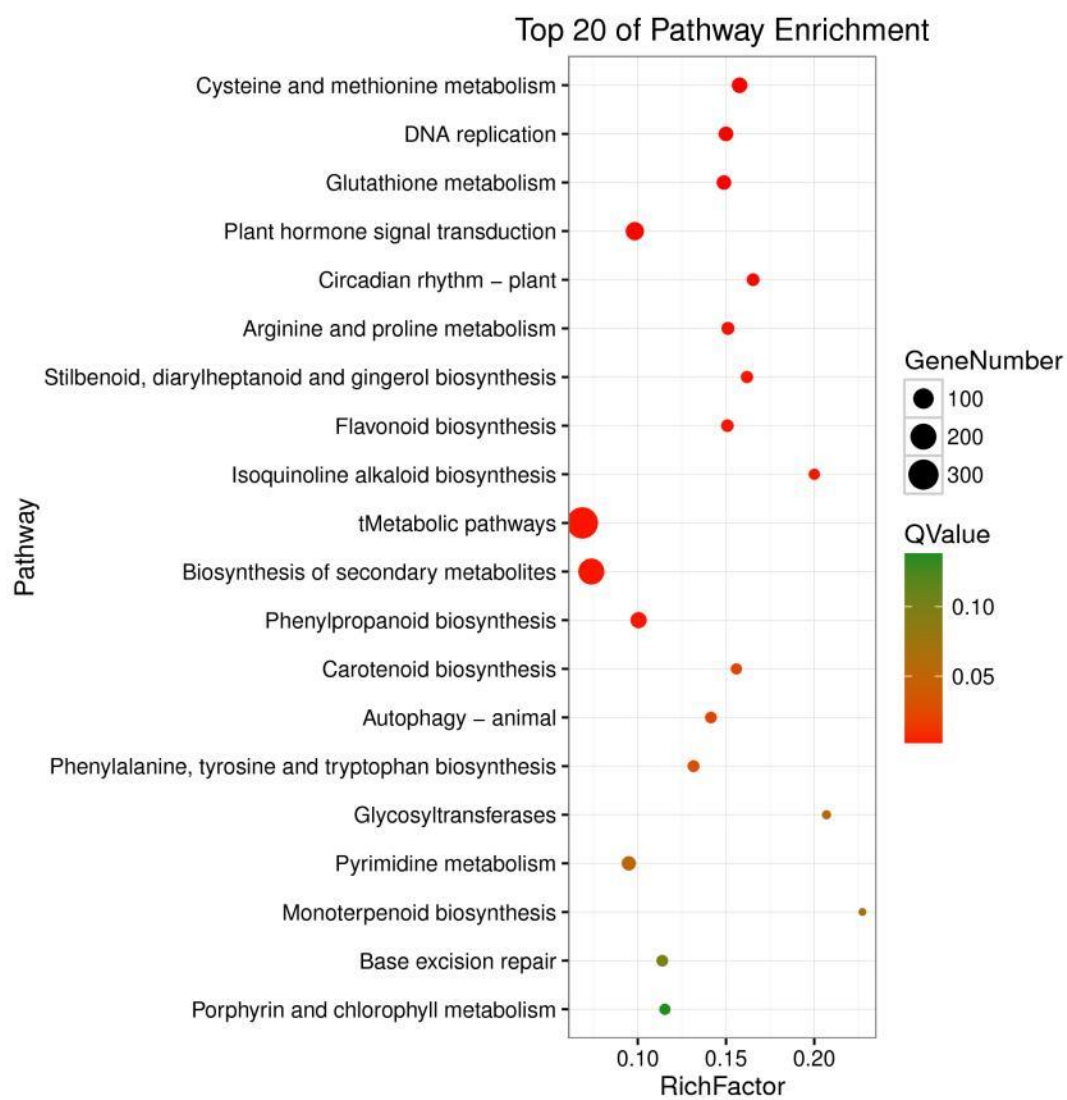

(a)

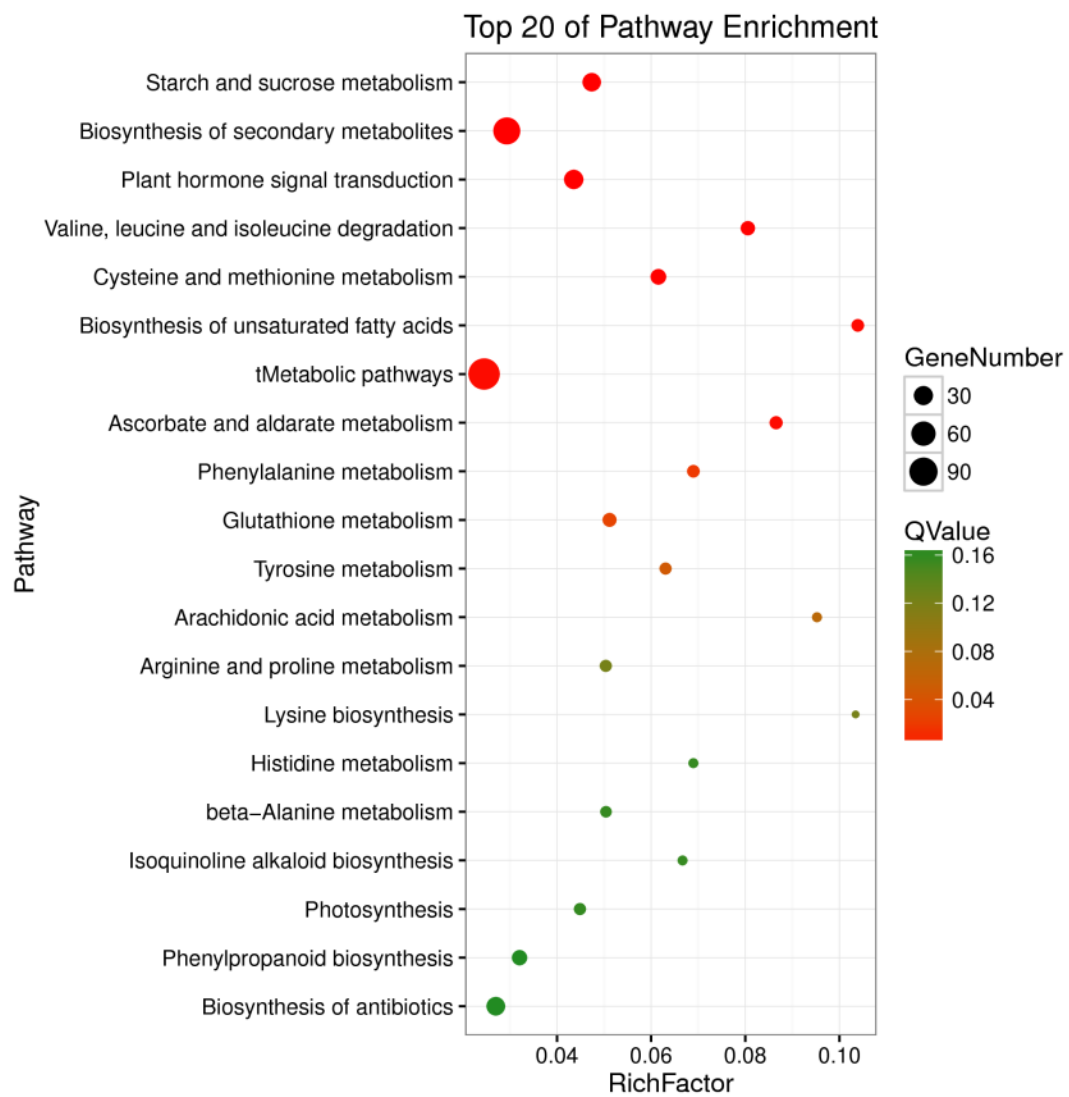

(b)



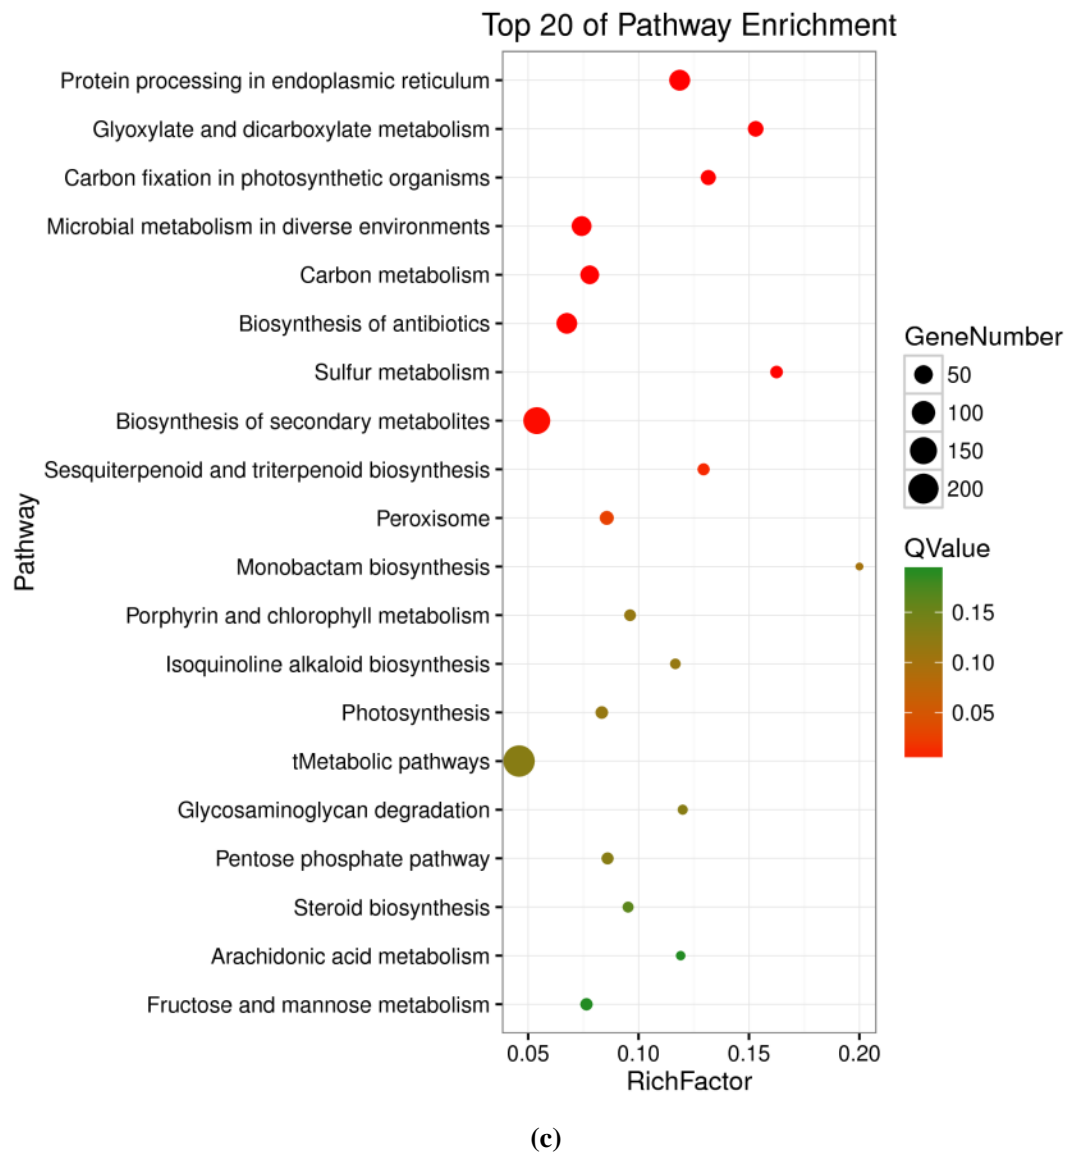

**Fig. S4** KEGG enrichment bubble chart of E- vs E+ DEGs. KEGG enrichment bubble chart of the differentially expressed genes at (a) 0, (b) 24 and (c) 72 hr of infection with powdery mildew. Q value is characterized by different colors, as shown in the example on the right, and red indicates  $Q < 0.05$ .

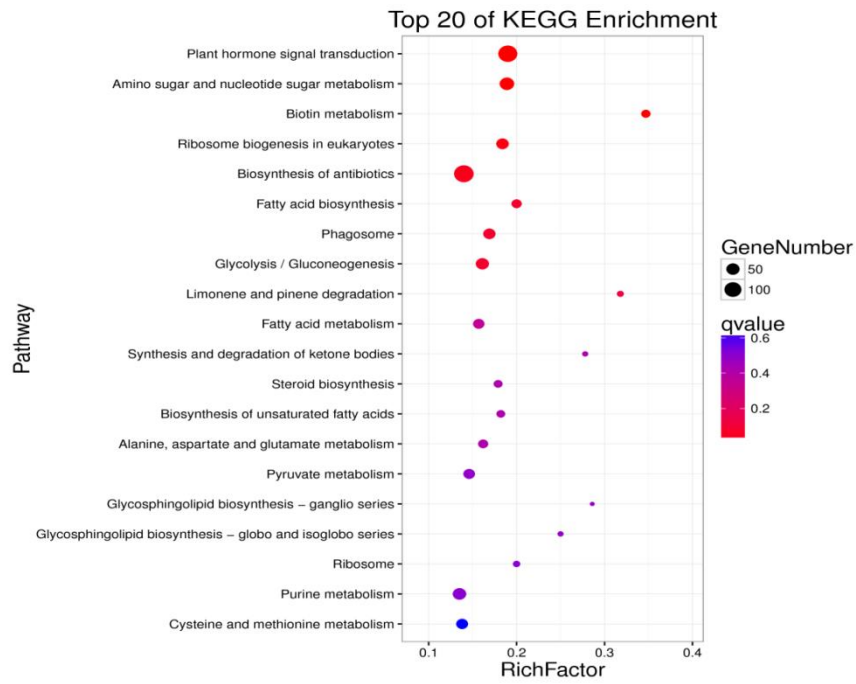

(a)

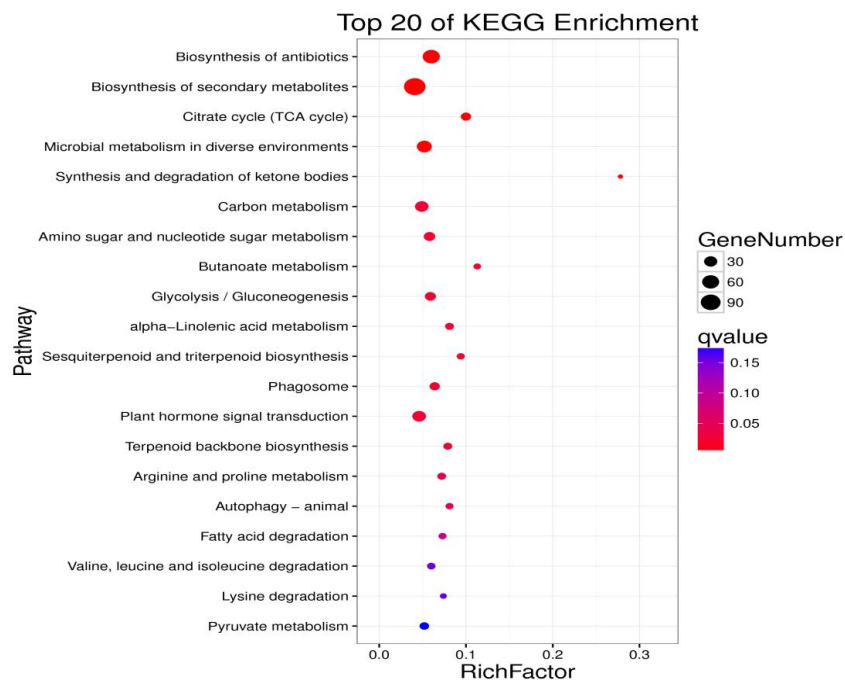

(b)

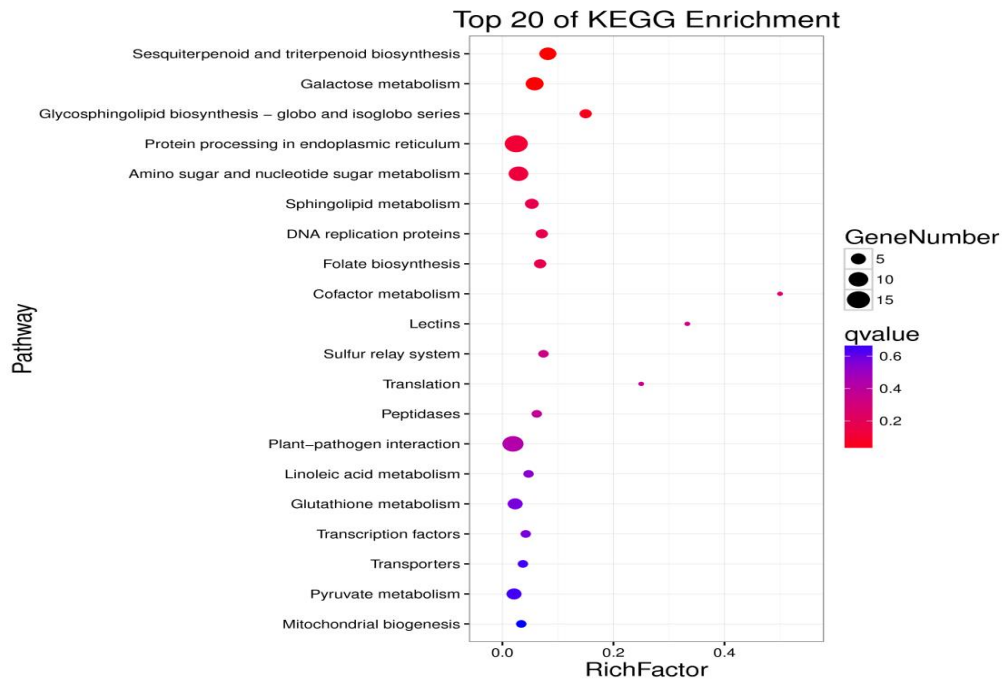

(c)

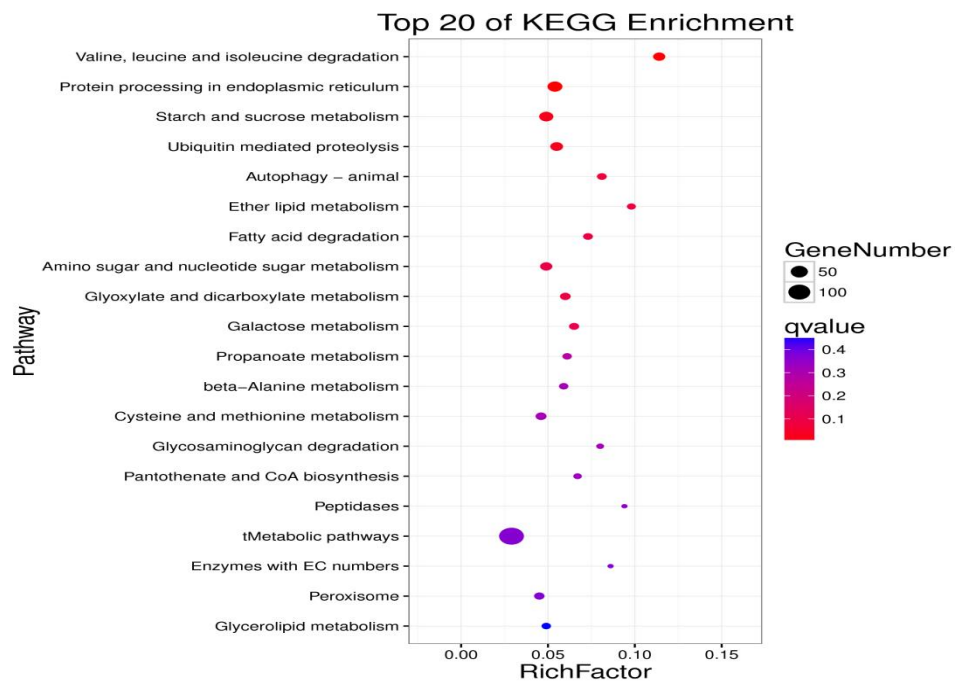

(d)

**Fig. S5** KEGG enrichment bubble chart of profile 1 and profile 4. (a) (b) showed KEGG enrichment bubble chart of profile1 in E- and E+ plants, respectively; (c) (d) showed KEGG enrichment bubble chart of profile4 in E- and E+ plants, respectively. Q value is characterized by different colors, as shown in the example on the right.

**Table S1** UHPLC–MS/MS parameters for the quantification of SA

| Compound  | Polarity | Precursor (m/z) | Product (m/z) | Collision energy(v) | RF Lens (v) |
|-----------|----------|-----------------|---------------|---------------------|-------------|
| Salicylic | Negative | 136.912         | 64.958        | 27.55               | 57          |
| acid      | Negative | 136.912         | 92.887        | 15.61               | 57          |

**Table S2** Primers used for qRT-PCR validation

| Gene              | Accession number | Primer name         | Primer sequence      |
|-------------------|------------------|---------------------|----------------------|
| Efl $\alpha$      | AF120093         | Efl $\alpha$ -F     | GTATGATGAAATCGTGAAGG |
|                   |                  | Efl $\alpha$ -R     | CAGAGATGGGGACAAAGG   |
| JAR1-like isoform | XM_016588992.1   | JAR1-like isoform-F | GTCAGTGTCCCGTCCATA   |
|                   |                  | JAR1-like isoform-R | CGTTTACTCCAACCCATC   |
| WRKY40            | XM_016651389.1   | WRKY40-F            | GTGAAAGATGAGGCAGGT   |
|                   |                  | WRKY40-R            | GTTGTTGGGATTGGAGAT   |
| JAR1-like isoform | XM_016630684.1   | JAR1-like isoform-F | TTGGAAGAAAATGGAGGG   |
|                   |                  | JAR1-like isoform-R | TGTGGGTGACAATGGGTA   |
| CERK1             | XM_016603843.1   | CERK1-F             | GCTGGCTGGTTTGGTTTA   |
|                   |                  | CERK1-R             | TGATGGAGGTGGTCTTCG   |
| BGLU like         | XM_016617986.1   | BGLU like-F         | TCCTCCCATCTACATCAC   |
|                   |                  | BGLU like-R         | TAAAACCAGCATCCCATT   |
| WRKY31            | XM_016651798.1   | WRKY31-F            | ACTTTACTCCCTTGTTCC   |
|                   |                  | WRKY31-R            | ATGTTGAGGCGTTCTGTC   |
| WRKY7             | XM_016618988.1   | WRKY7-F             | CGGTTCTACGGAAAGTCG   |
|                   |                  | WRKY7-R             | AAGGGGTAACGGAGGCAA   |
| RBOHC             | XM_016650414.1   | RBOHC-F             | CAAAGAGGAGGCGAAAGT   |
|                   |                  | RBOHC-R             | CACACAGGGACCCATGAC   |

**Table S3** The results of mapped reads of 18 samples. T: Treatment (E+ plants , inoculated with endophytes *Seimatosporium* sp.); C: control (E- plants, without *Seimatosporium* sp. inoculation) respectively; 0, 24 and 72 represent 0, 24 and 72 hours of infection with powdery mildew, respectively; 1, 2, and 3 represent triplicate samples.

| Sample | Total Reads | Unmapped Reads | Unique Mapped Reads | Multiple Mapped Reads | Mapping Ratio |
|--------|-------------|----------------|---------------------|-----------------------|---------------|
| T0-1   | 35516458    | 2752088        | 32215624(90.71%)    | 548746 (1.55%)        | 92.25%        |
| T0-2   | 32860452    | 2519239        | 29810829 (90.72%)   | 530384 (1.61%)        | 92.33%        |
| T0-3   | 33375618    | 2548923        | 30279133 (90.72%)   | 547562 (1.64%)        | 92.36%        |
| T24-1  | 32862502    | 2416784        | 29963176 (91.18%)   | 482542 (1.47%)        | 92.65%        |
| T24-2  | 37285354    | 2794928        | 33888022 (90.89%)   | 602404 (1.62%)        | 92.50%        |
| T24-3  | 30025614    | 3708748        | 25843280 (86.07%)   | 473586 (1.58%)        | 87.65%        |
| T72-1  | 24636064    | 3098761        | 21217297 (86.12%)   | 320006 (1.30%)        | 87.42%        |
| T72-2  | 38199322    | 2794860        | 34841404 (91.21%)   | 563058 (1.47%)        | 92.68%        |
| T72-3  | 36475100    | 2800971        | 33075431 (90.68%)   | 598698 (1.64%)        | 92.32%        |
| C0-1   | 40703052    | 3255680        | 36740564 (90.26%)   | 706808 (1.74%)        | 92.00%        |
| C0-2   | 40452040    | 3059232        | 36682720 (90.68%)   | 710088 (1.76%)        | 92.44%        |
| C0-3   | 42052442    | 3280451        | 38028503 (90.43%)   | 743488 (1.77%)        | 92.20%        |
| C24-1  | 36932384    | 2505963        | 33805849 (91.53%)   | 620572 (1.68%)        | 93.21%        |
| C24-2  | 42284976    | 3092015        | 38490313 (91.03%)   | 702648 (1.66%)        | 92.69%        |
| C24-3  | 44180332    | 3298097        | 40124741 (90.82%)   | 757494 (1.71%)        | 92.53%        |
| C72-1  | 46034962    | 3354260        | 41888924 (90.99%)   | 791778 (1.72%)        | 92.71%        |
| C72-2  | 36042370    | 2616973        | 32868117 (91.19%)   | 557280 (1.55%)        | 92.74%        |
| C72-3  | 39031126    | 2882987        | 35528513 (91.03%)   | 619626 (1.59%)        | 92.61%        |

**Table S4** Differential gene expression levels of selected up- or downregulated genes. Pairwise comparisons C0 vs T0, C24 vs T24, C72 vs T72 are shown. T: Treatment (E+ plants , inoculated with endophytes *Seimatosporium* sp.); C: control (E- plants, without *Seimatosporium* sp. inoculation) respectively; 0, 24 and 72 represent 0, 24 and 72 hours of infection with powdery mildew, respectively.

| Accession number | Putative function | C0 vs T0      | C24 vs T24    | C72 vs T72    |
|------------------|-------------------|---------------|---------------|---------------|
| XM_016612404.1   | TGA1-like         | upregulated   | -             | -             |
| XM_016654927.1   | TGA-1a-like       | upregulated   | -             | -             |
| XM_016640845.1   | TGA-1a-like       | upregulated   | -             | -             |
| XM_016625627.1   | TGA6              | -             | upregulated   | -             |
| XM_016602112.1   | TGA6-like         | -             | -             | downregulated |
| XP_009768533.1   | WRKY4             | downregulated | -             | -             |
| XP_009587051.1   | WRKY6             | upregulated   | -             | -             |
| XM_016580199.1   | WRKY41            | upregulated   | -             | -             |
| XM_016581187.1   | WRKY31            | upregulated   | -             | -             |
| XM_016581234.1   | WRKY3             | downregulated | -             | -             |
| XM_016607873.1   | WRKY68            | upregulated   | -             | -             |
| XM_016610715.1   | WRKY7             | upregulated   | upregulated   | -             |
| XM_016614949.1   | WRKY49            | downregulated | -             | -             |
| XM_016618988.1   | WRKY7             | upregulated   | -             | -             |
| XM_016619314.1   | WRKY7             | upregulated   | -             | -             |
| XM_016621642.1   | WRKY40            | downregulated | -             | -             |
| XM_016624990.1   | WRKY41            | upregulated   | -             | -             |
|                  | isoform           |               |               |               |
| XM_016625844.1   | WRKY11            | upregulated   | -             | -             |
| XM_016631125.1   | WRKY65            | upregulated   | -             | -             |
| XM_016631674.1   | WRKY22-like       | upregulated   | -             | -             |
| XM_016634340.1   | WRKY44            | downregulated | -             | -             |
| XM_016638899.1   | WRKY41            | upregulated   | -             | -             |
| XM_016641002.1   | WRKY53            | upregulated   | -             | -             |
| XM_016643087.1   | WRKY7             | upregulated   | -             | -             |
| XM_016651798.1   | WRKY31            | upregulated   | -             | -             |
| XM_016651389.1   | WRKY40            | downregulated | -             | -             |
| XM_016582122.1   | WRKY70            | -             | downregulated | -             |
|                  | isoform           |               |               |               |
| XM_016606924.1   | WRKY69            | -             | downregulated | -             |
|                  | isoform           |               |               |               |
| XM_016644013.1   | WRKY7             | -             | upregulated   | -             |
| XM_016591510.1   | WRKY50            | -             | -             | downregulated |
| XM_016638899.1   | WRKY41            | -             | -             | upregulated   |
| ABY59789.1       | MES3              | upregulated   | -             | -             |
| XM_016588992.1   | JAR1-like         | upregulated   | -             | -             |
|                  | isoform           |               |               |               |

| Accession number | Putative function | C0 vs T0      | C24 vs T24  | C72 vs T72    |
|------------------|-------------------|---------------|-------------|---------------|
| XM_016630684.1   | JAR1-like isoform | upregulated   | upregulated | -             |
| XM_016584785.1   | 4CL               | upregulated   | -           | -             |
| XP_009759945.1   | PAL               | -             | upregulated | -             |
| XM_016588500.1   | PAL               | -             | -           | upregulated   |
| XM_016617986.1   | BGLU              | downregulated | -           | -             |
| XLOC_023187      | HCT-like          | upregulated   | -           | -             |
| XLOC_044024      | HCT-like          | upregulated   | -           | -             |
| ncbi_107768362   | HCT-like          | upregulated   | -           | -             |
| ncbi_107772942   | HCT-like          | upregulated   | -           | -             |
| ncbi_107789426   | HCT-like          | upregulated   | -           | upregulated   |
| ncbi_107796658   | HCT               | upregulated   | -           | upregulated   |
| ncbi_107804864   | HCT-like          | upregulated   | -           | downregulated |
| ncbi_107826939   | HCT-like isoform  | -             | -           | upregulated   |
| ncbi_107777955   | CAD6              | downregulated | -           | -             |
| ncbi_107789450   | CAD1              | upregulated   | -           | -             |
| ncbi_107790164   | CAD6              | downregulated | -           | -             |
| ncbi_107798963   | CAD6              | upregulated   | -           | -             |
| ncbi_107816761   | CAD2              | downregulated | -           | -             |
| ncbi_107767921   | CCR2-like         | upregulated   | -           | -             |
| XLOC_025770      | POD 51-like       | upregulated   | -           | -             |
| ncbi_107759554   | POD 51-like       | upregulated   | -           | -             |
| ncbi_107762756   | POD 66-like       | downregulated | -           | -             |
| ncbi_107765883   | POD 63-like       | downregulated | -           | -             |
| ncbi_107770624   | POD 12-like       | upregulated   | -           | -             |
| ncbi_107777661   | POD 7-like        | upregulated   | -           | -             |
| ncbi_107782926   | POD 7-like        | upregulated   | -           | -             |
| ncbi_107794292   | POD 63-like       | downregulated | upregulated | -             |
| ncbi_107804632   | POD 51-like       | upregulated   | -           | upregulated   |
| ncbi_107808759   | POD 12-like       | upregulated   | -           | -             |
| ncbi_107813838   | POD 12-like       | downregulated | -           | -             |
| ncbi_107828946   | POD 12-like       | downregulated | -           | -             |
| ncbi_107794830   | POD 21            | -             | upregulated | -             |
| ncbi_107806425   | POD3              | -             | upregulated | upregulated   |
| ncbi_107807567   | POD3-like         | -             | upregulated | upregulated   |
| ncbi_107786793   | POD6              | -             | upregulated | -             |
| ncbi_107758994   | POD19             | -             | -           | downregulated |
| ncbi_107770624   | POD12-like        | -             | -           | upregulated   |
| ncbi_107773042   | POD N1-like       | -             | -           | upregulated   |
| ncbi_107794830   | POD21             | -             | -           | upregulated   |
| ncbi_107815364   | POD48-like        | -             | -           | upregulated   |



| Accession number | Putative function       | C0 vs T0      | C24 vs T24  | C72 vs T72    |
|------------------|-------------------------|---------------|-------------|---------------|
| XLOC_059410      | CML21                   | upregulated   | -           | -             |
| ncbi_107771773   | CML18                   | upregulated   | -           | upregulated   |
| ncbi_107813448   | CML41                   | downregulated | -           | -             |
| ncbi_107817356   | CML44                   | upregulated   | -           | -             |
| ncbi_107817357   | CML44                   | upregulated   | -           | -             |
| ncbi_107819435   | CML44                   | upregulated   | upregulated | -             |
| ncbi_107823367   | CML41                   | -             | upregulated | -             |
| ncbi_107790990   | CML1                    | downregulated | -           | -             |
| ncbi_107792965   | CML1                    | downregulated | -           | -             |
| ncbi_107803626   | CML1                    | downregulated | -           | -             |
| ncbi_107813304   | CML3                    | upregulated   | -           | -             |
| ncbi_107792571   | CaM                     | -             | upregulated | -             |
| ncbi_107763763   | CDPK17-like             | downregulated | -           | -             |
| ncbi_107767341   | CDPK-like<br>isoform X2 | downregulated | -           | -             |
| ncbi_107807275   | calmodulin-like         | upregulated   | upregulated | -             |
| ncbi_107768378   | PR-1like                | upregulated   | upregulated | -             |
| ncbi_107798618   | PR-1like                | upregulated   | -           | -             |
| ncbi_107763263   | PR-1c                   | -             | -           | downregulated |
| ncbi_107807832   | PR-1b                   | -             | -           | downregulated |
| ncbi_107765038   | PR-5 like               | downregulated | -           | -             |
| ncbi_107770507   | PR-10a like             | upregulated   | -           | -             |
| ncbi_107830187   | PR-10a like             | upregulated   | -           | downregulated |
| ncbi_107831906   | PR-5 like<br>isoform    | upregulated   | -           | downregulated |
| ncbi_107832140   | PR-5 like<br>isoform    | upregulated   | upregulated | -             |
| ncbi_107804128   | PR-5 like               | -             | upregulated | -             |
| ncbi_107766311   | PR-4b                   | -             | -           | downregulated |
| ncbi_107791665   | PR-1 like               | -             | -           | downregulated |
| ncbi_107802320   | PR-4a                   | -             | -           | downregulated |
| ncbi_107808479   | PR-10a like             | -             | -           | downregulated |
| ncbi_107823075   | PR-10a like             | -             | -           | downregulated |
| ncbi_107823159   | PR-1 like               | -             | -           | downregulated |
